# Supplementary material
Source: ML conference proceedings conference paper supplement (https://proceedings.neurips.cc/paper_files/paper/2018/hash/17c276c8e723eb46aef576537e9d56d0-Abstract.html)
Supplement: Supplementary file [file 17c276c8e723eb46aef576537e9d56d0-Supplemental.zip]

---

# Supplementary Material for Global Gated Mixture of Second-order Pooling for Improving Deep Convolutional Neural Networks

---

Qilong Wang<sup>1,2,\*†</sup>, Zilin Gao<sup>2,\*</sup>, Jiangtao Xie<sup>2</sup>, Wangmeng Zuo<sup>3</sup>, Peihua Li<sup>2,‡</sup>

<sup>1</sup>Tianjin University, <sup>2</sup>Dalian University of Technology, <sup>3</sup> Harbin Institute of Technology  
qlwang@tju.edu.cn, gzl@mail.dlut.edu.cn, jiangtaoxie@mail.dlut.edu.cn  
wmzuo@hit.edu.cn, peihuali@dlut.edu.cn

## 1 Relationship between Parametric SOP and Covariance of Multivariate Generalized Gaussian Distribution

Here, we show our parametric second-order pooling (SOP) shares similar philosophy with estimation of covariance by assuming features are sampled from a generalized multivariate Gaussian distribution with zero mean. Firstly, our parametric SOP takes the following form:

$$\Sigma(\mathbf{Q}_j) = \mathbf{X}^T \mathbf{Q}_j \mathbf{X} = (\mathbf{P}_j \mathbf{X})^T (\mathbf{P}_j \mathbf{X}), \quad (1)$$

where  $\mathbf{Q}_j$  is a learnable matrix, and  $\mathbf{Q}_j$  is a symmetric positive definite matrix, which has a unique decomposition  $\mathbf{Q}_j = \mathbf{P}_j^T \mathbf{P}_j$ . Given a set of  $\mathbf{X} \in \mathbb{R}^{L \times d} = \{\mathbf{x}_1, \dots, \mathbf{x}_L\}$ , their generalized multivariate Gaussian distribution with zero mean [5] can be represented as

$$p(\mathbf{x}_l; \hat{\Sigma}; \delta; \varepsilon) = \frac{\Gamma(d/2)}{\pi^{d/2} \Gamma(d/2\delta) 2^{d/2\delta}} \frac{\delta}{\varepsilon^{d/2} |\hat{\Sigma}|^{1/2}} \exp \left( -\frac{1}{2\varepsilon\delta} (\mathbf{x}_l \hat{\Sigma}^{-1} \mathbf{x}_l^T)^\delta \right), \quad (2)$$

where  $\varepsilon$  and  $\delta$  are parameters of scale and shape, respectively;  $\hat{\Sigma}$  is covariance matrix, and  $\Gamma$  is a Gamma function. Under maximum likelihood criterion, given  $\delta$  and  $\varepsilon$ , covariance matrix  $\hat{\Sigma}$  can be estimated by:

$$\arg \min_{\hat{\Sigma}} \sum_{l=1}^L (\mathbf{x}_l \hat{\Sigma}^{-1} \mathbf{x}_l^T)^\delta + N \log |\hat{\Sigma}|. \quad (3)$$

As shown in [1, 6], the objective function in Eq. (3) can converge to a stationary point by using iterative reweighted methods, whose  $j$ -th iteration has the following form:

$$\hat{\Sigma}_j = \frac{1}{L} \sum_{l=1}^L \frac{Ld}{\mathbf{q}_l^j + (\mathbf{q}_l^j)^{1-\delta} \sum_{k \neq j} (\mathbf{q}_k^j)^\delta} \cdot \mathbf{x}_l^T \mathbf{x}_l, \quad \mathbf{q}_l^j = \mathbf{x}_l \hat{\Sigma}_{j-1} \mathbf{x}_l^T. \quad (4)$$

Let  $f_j(\mathbf{x}_l) = \frac{Ld}{\mathbf{q}_l^j + (\mathbf{q}_l^j)^{1-\delta} \sum_{k \neq j} (\mathbf{q}_k^j)^\delta}$ , we have

$$\hat{\Sigma}_j = \mathbf{X}^T \hat{\mathbf{G}}_j \mathbf{X} = (\hat{\mathbf{R}}_j \mathbf{X})^T (\hat{\mathbf{R}}_j \mathbf{X}), \quad (5)$$

where  $\hat{\mathbf{G}}_j$  and  $\hat{\mathbf{R}}_j$  are diagonal matrices, and their diagonal elements are  $\{f_j(\mathbf{x}_1)/L, \dots, f_j(\mathbf{x}_L)/L\}$  and  $\{\sqrt{f_j(\mathbf{x}_1)/L}, \dots, \sqrt{f_j(\mathbf{x}_L)/L}\}$ , respectively. Comparing Eq. (1) with Eq. (5), it is evident that,

---

\*The first two authors contribute equally to this work.

†This work was mainly done when he was with Dalian University of Technology.

‡Peihua Li is the corresponding author.

in each iteration, our parametric SOP learns a full matrix  $\mathbf{P}_j$ , while iterative reweighted methods [1, 6] learn the diagonal  $\hat{\mathbf{R}}_j$ .

According to Eq. (5), iterative reweighted methods can be accomplished by  $J$  iterations:

$$\hat{\Sigma} = (\hat{\mathbf{R}}_T \cdots \hat{\mathbf{R}}_1 \mathbf{X})^T (\hat{\mathbf{R}}_T \cdots \hat{\mathbf{R}}_1 \mathbf{X}), \quad (6)$$

Correspondingly we can learn a sequence of parameters  $\mathbf{Q}_j$ ,  $\{j = 1, \dots, J\}$  for our parametric SOP, i.e.,

$$\Sigma = (\mathbf{P}_T \cdots \mathbf{P}_1 \mathbf{X})^T (\mathbf{P}_T \cdots \mathbf{P}_1 \mathbf{X}). \quad (7)$$

Since  $\mathbf{P}_j \mathbf{X}$  can be conveniently implemented using  $1 \times 1$  convolution, our parametric SOP can be transformed into learning multiple sequential  $1 \times 1$  convolution operations following by computation of SOP. Eqs. (5) and (7) clearly show our parametric SOP and covariance of multivariate generalized Gaussian distribution share the similar form.

## 2 Details of Matrix Square Root of Covariance Based on Newton-Schulz Iteration [2]

Let  $\mathbf{A}_0 = \Sigma$  and  $\mathbf{B}_0 = \mathbf{I}$ , according to Newton-Schulz iteration [2], we have

$$\mathbf{A}_{\tilde{j}} = \frac{1}{2} \mathbf{A}_{\tilde{j}-1} (3\mathbf{I} - \mathbf{B}_{\tilde{j}-1} \mathbf{A}_{\tilde{j}-1}); \quad \mathbf{B}_{\tilde{j}} = \frac{1}{2} (3\mathbf{I} - \mathbf{B}_{\tilde{j}-1} \mathbf{A}_{\tilde{j}-1}) \mathbf{B}_{\tilde{j}-1}, \quad (8)$$

where  $\mathbf{A}_{\tilde{j}}$  and  $\mathbf{B}_{\tilde{j}}$  will converge to  $\Sigma^{\frac{1}{2}}$  and  $\Sigma^{-\frac{1}{2}}$  after  $\tilde{J}$  iterations, respectively. However, Eq. (8) requires norm of  $(\mathbf{I} - \Sigma)$ , i.e.,  $\|\mathbf{I} - \Sigma\| < 1$ . The recently proposed method [4] introduces pre-normalization (i.e.,  $\tilde{\Sigma} = \frac{1}{\text{tr}(\Sigma)} \Sigma$ ) and post-compensation operations (i.e.,  $\mathbf{Z} = \sqrt{\text{tr}(\Sigma)} \mathbf{A}_{\tilde{j}}$ ) for Newton-Schulz iteration in Eq. (8), and develop a back-propagation (BP) algorithm based on matrix back-propagation method [3] for end-to-end learning. Specifically, given the loss function  $l$ , BP for post-compensation can be achieved by

$$\frac{\partial l}{\partial \mathbf{A}_{\tilde{j}}} = \sqrt{\text{tr}(\Sigma)} \frac{\partial l}{\partial \mathbf{Z}}; \quad \frac{\partial l}{\partial \Sigma} \Big|_{\text{post}} = \frac{1}{2\sqrt{\text{tr}(\Sigma)}} \text{tr} \left( \left( \frac{\partial l}{\partial \mathbf{Z}} \right)^T \mathbf{A}_{\tilde{j}} \right) \mathbf{I}. \quad (9)$$

Let  $\frac{\partial l}{\partial \mathbf{B}_{\tilde{j}}} = 0$ , for  $\tilde{j} = \tilde{J}, \dots, 2$ , BP of Newton-Schulz iteration can be accomplished with

$$\begin{aligned} \frac{\partial l}{\partial \mathbf{A}_{\tilde{j}-1}} &= \frac{1}{2} \left( \frac{\partial l}{\partial \mathbf{A}_{\tilde{j}}} (3\mathbf{I} - \mathbf{A}_{\tilde{j}-1} \mathbf{B}_{\tilde{j}-1}) - \mathbf{B}_{\tilde{j}-1} \frac{\partial l}{\partial \mathbf{B}_{\tilde{j}}} \mathbf{B}_{\tilde{j}-1} - \mathbf{B}_{\tilde{j}-1} \mathbf{A}_{\tilde{j}-1} \frac{\partial l}{\partial \mathbf{A}_{\tilde{j}}} \right) \\ \frac{\partial l}{\partial \mathbf{B}_{\tilde{j}-1}} &= \frac{1}{2} \left( (3\mathbf{I} - \mathbf{A}_{\tilde{j}-1} \mathbf{B}_{\tilde{j}-1}) \frac{\partial l}{\partial \mathbf{B}_{\tilde{j}}} - \mathbf{A}_{\tilde{j}-1} \frac{\partial l}{\partial \mathbf{A}_{\tilde{j}}} \mathbf{A}_{\tilde{j}-1} - \frac{\partial l}{\partial \mathbf{B}_{\tilde{j}}} \mathbf{B}_{\tilde{j}-1} \mathbf{A}_{\tilde{j}-1} \right). \end{aligned} \quad (10)$$

When  $\tilde{j} = 1$ , we have

$$\frac{\partial l}{\partial \tilde{\Sigma}} = \frac{1}{2} \left( \frac{\partial l}{\partial \mathbf{A}_1} (3\mathbf{I} - \tilde{\Sigma}) - \frac{\partial l}{\partial \mathbf{B}_1} - \tilde{\Sigma} \frac{\partial l}{\partial \mathbf{A}_1} \right). \quad (11)$$

Finally, BP of pre-normalization can be computed as

$$\frac{\partial l}{\partial \Sigma} = -\frac{1}{(\text{tr}(\Sigma))^2} \text{tr} \left( \left( \frac{\partial l}{\partial \tilde{\Sigma}} \right)^T \Sigma \right) \mathbf{I} + \frac{1}{\text{tr}(\Sigma)} \frac{\partial l}{\partial \tilde{\Sigma}} + \frac{\partial l}{\partial \Sigma} \Big|_{\text{post}}. \quad (12)$$

Eq. (12) is the gradient of loss function  $l$  with respect to  $\Sigma$ , which is used to achieve BP for matrix square root of covariance. Readers can refer to [4] for more details.

## References

- [1] O. Arslan. Convergence behavior of an iterative reweighting algorithm to compute multivariate m-estimates for location and scatter. *Journal of Statistical Planning and Inference*, 118:115–128, 2004.
- [2] N. J. Higham. *Functions of Matrices: Theory and Computation*. Society for Industrial and Applied Mathematics, Philadelphia, PA, USA, 2008.

- [3] C. Ionescu, O. Vantzos, and C. Sminchisescu. Training deep networks with structured layers by matrix backpropagation. *arXiv*, abs/1509.07838, 2015.
- [4] P. Li, J. Xie, Q. Wang, and Z. Gao. Towards faster training of global covariance pooling networks by iterative matrix square root normalization. In *CVPR*, 2018.
- [5] F. Pascal, L. Bombrun, J. Tournet, and Y. Berthoumieu. Parameter estimation for multivariate generalized Gaussian distributions. *IEEE TSP*, 61(23):5960–5971, 2013.
- [6] T. Zhang, A. Wiesel, and M. S. Greco. Multivariate generalized Gaussian distribution: Convexity and graphical models. *IEEE TSP*, 61(16):4141–4148, 2013.
